# Supplementary material for: Mad1 contribution to spindle assembly checkpoint signalling goes beyond presenting Mad2 at kinetochores
Source: PubMed Central journal article supplement — EMBO Rep. 2014 Jan 29;15(3):291–8. doi: 10.1002/embr.201338114 (PMC3989695; doi:10.1002/embr.201338114), 2014-01-29
Supplement: embr0015-0291-sd2.pdf [file embr0015-0291-sd2.pdf]

**Fig. 1G**

Mad1 (anti-GFP)

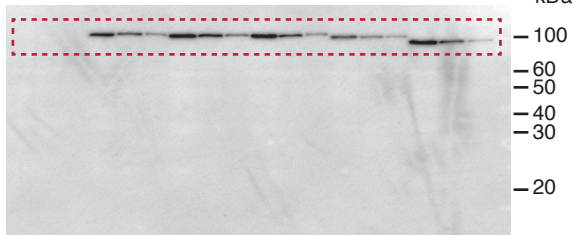

Cdc2

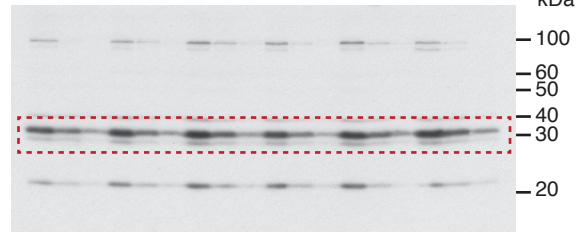

**Fig. 1H (left)**

Mad1 (anti-GFP)

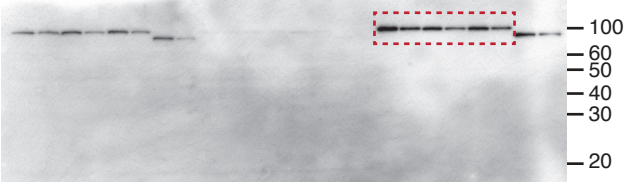

same exposure also shown in supplementary Fig. 1C

Mad2

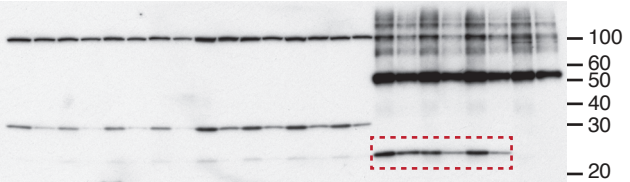

Mad2

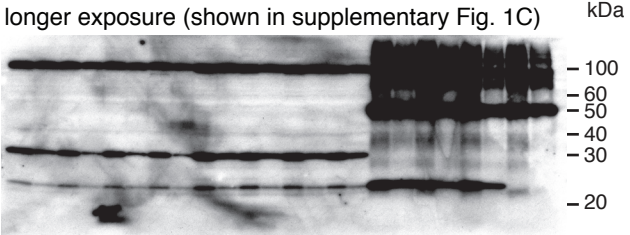

**Fig. 1H (right)**

Mad1 (anti-Mad1)

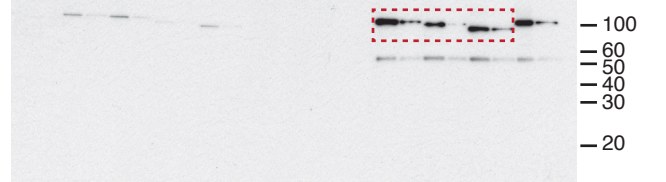

Mad1 (anti-Mad1)

longer exposure (shown in supplementary Fig. 1C)

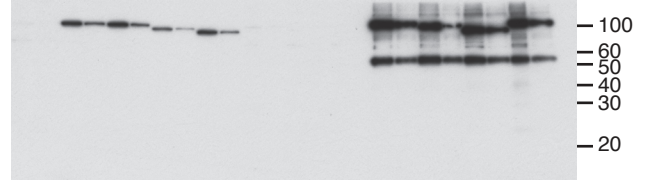

Mad2

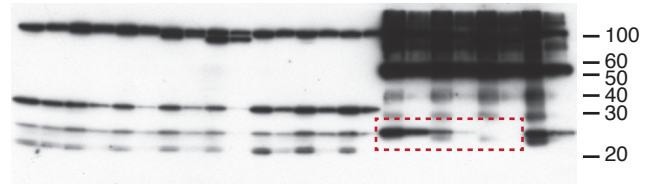

same exposure also shown in supplementary Fig. 1C
