# Supplementary material for: Mad1 contribution to spindle assembly checkpoint signalling goes beyond presenting Mad2 at kinetochores
Source: PubMed Central journal article supplement — EMBO Rep. 2014 Jan 29;15(3):291–8. doi: 10.1002/embr.201338114 (PMC3989695; doi:10.1002/embr.201338114), 2014-01-29
Supplement: embr0015-0291-sd5.pdf [file embr0015-0291-sd5.pdf]

Figure S1

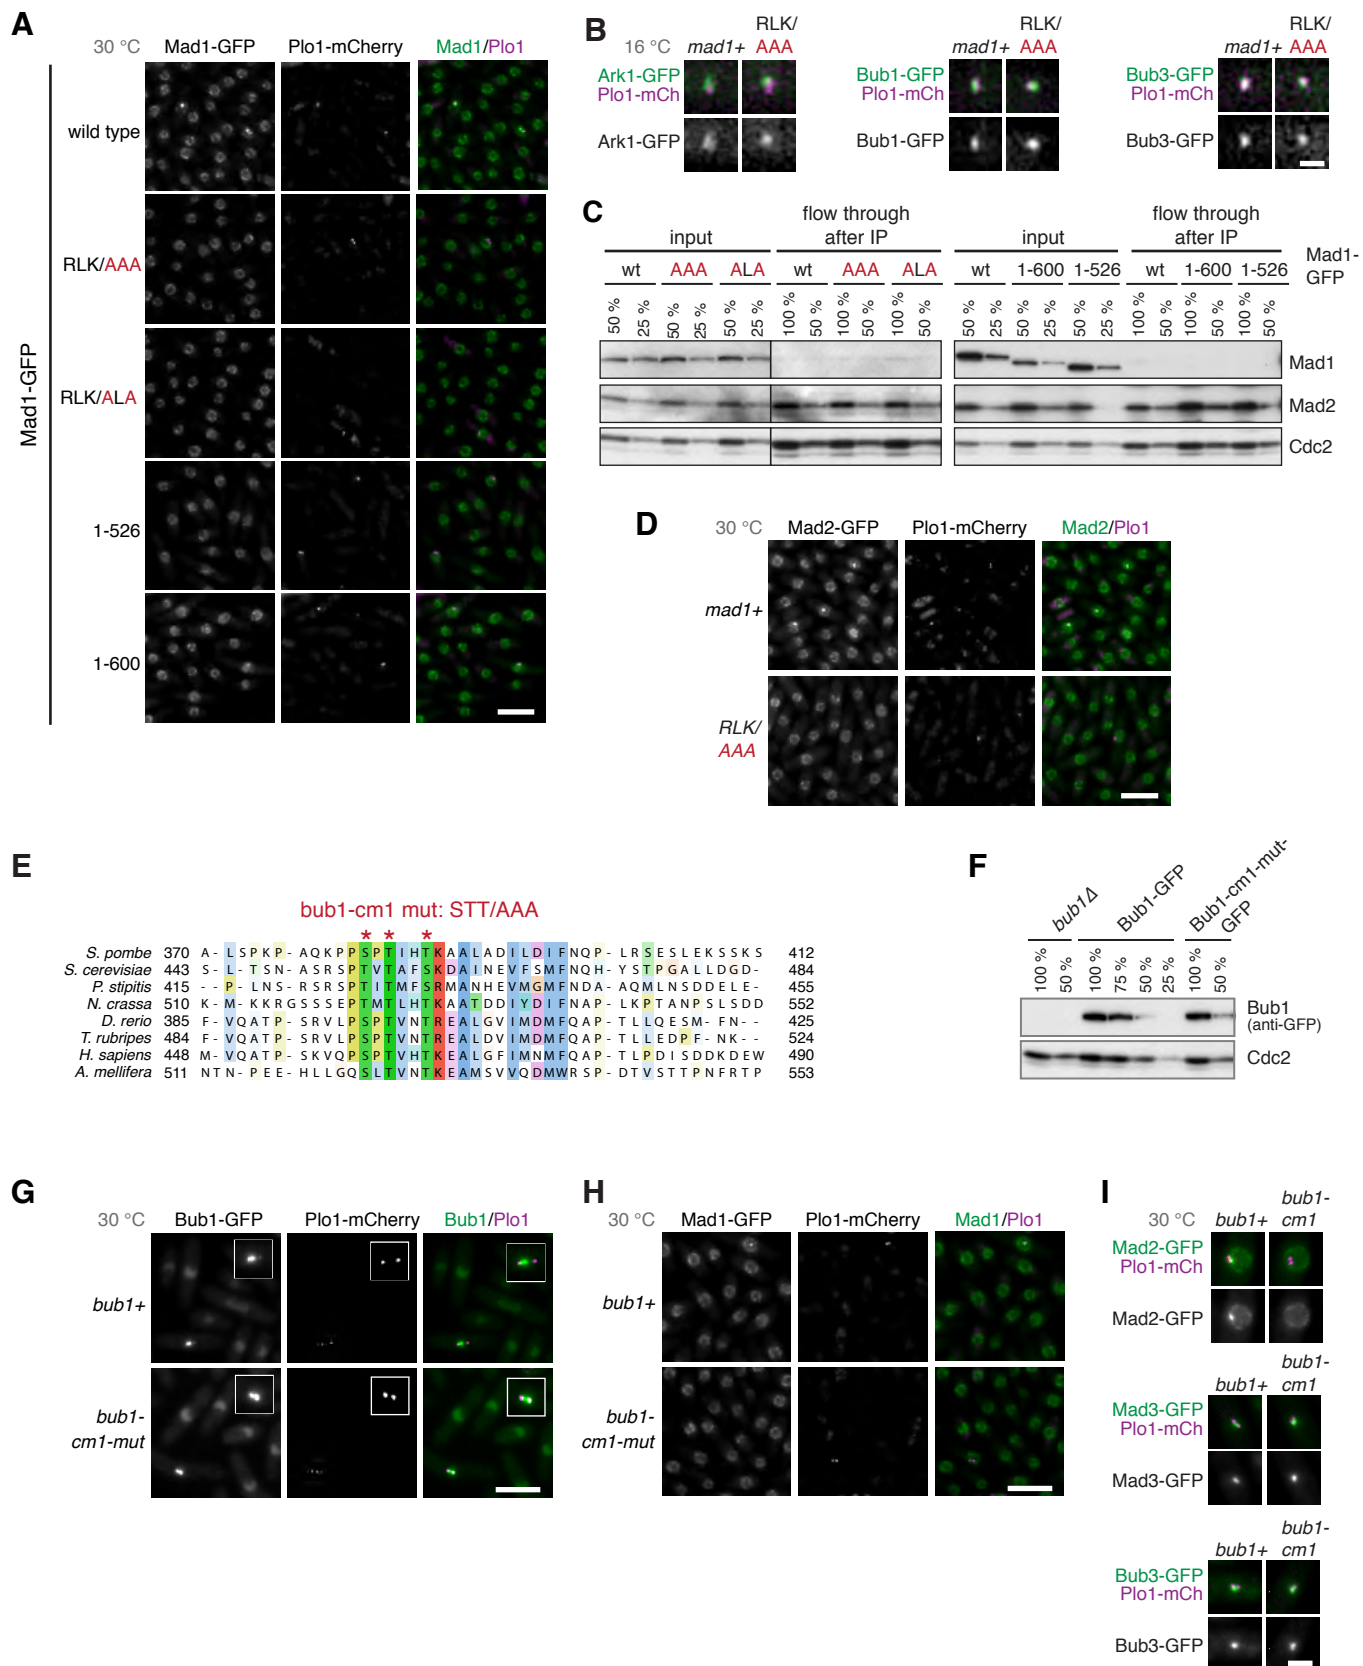

## Figure S1 Additional analysis of Mad1-RLK and Bub1-cm1 mutants

### A Mad1-RLK mutants and C-terminal truncations localize to the nuclear rim

Representative images of cells expressing *plo1+-mCherry*, *nda3-KM311* and the indicated *mad1-GFP* fusions. Cells were grown at permissive temperature for *nda3-KM311* (30 °C). A localized Plo1-mCherry signal indicates that cells are in mitosis (scale bar: 10  $\mu$ m).

### B Ark1, Bub1 and Bub3 localize to kinetochores in the *mad1-RLK/AAA* mutant

Cells expressing *plo1+-mCherry*, *nda3-KM311* and the indicated GFP fusion proteins were analysed at the restrictive temperature for *nda3-KM311* (16 °C) as in Fig 1E. Representative nuclei of mitotic cells are shown (scale bar: 2  $\mu$ m).

### C Mad1 is efficiently depleted by immunoprecipitation

Input and flow through of the anti-Mad1 immunoprecipitation shown in Fig 1H. To detect the Mad1-RLK mutants, anti-GFP antibody was used; to detect the Mad1 truncations, anti-Mad1 antibody was used. Cdc2 serves as loading control. The C-terminal truncations Mad1-1-600 and Mad1-1-526 contain more Mad2 in the flow through, in agreement with inefficient binding of Mad2 to Mad1 (Fig 1H).

### D Mad2 localisation to kinetochores is strongly reduced in the *mad1-RLK/AAA* mutant

Representative images of cells expressing *mad1+* or *mad1-RLK/AAA*, as well as *mad2+-GFP*, *plo1+-mCherry* and *nda3-KM311*. Cells were grown at permissive temperature for *nda3-KM311* (30 °C). Mad2-GFP localisation to the nuclear rim in interphase is similar between wild type and *mad1-RLK/AAA* cells, but localisation to the kinetochore in mitosis is impaired in the *mad1-RLK/AAA* mutant (scale bar: 10  $\mu$ m).

### E Alignment of the Bub1 region containing the conserved motif 1 (cm1).

Sequences from OrthoMCL group OG5\_130700 were aligned using M-Coffee. Selected sequences are shown with Clustal X colouring scheme. Red asterisks indicate the amino acids mutated in the *bub1-cm1* mutant (S381A, T383A and T386A).

### F Bub1-cm1 mutant is present at similar levels as wild type Bub1

Extracts were analysed by immunoblotting using anti-GFP (to detect Bub1-GFP or Bub1-cm1-mut-GFP) and anti-Cdc2 (loading control) antibodies. Percentages on top indicate how much of the extract was loaded.

### G Bub1-cm1 mutant localisation resembles Bub1 wt localisation

Representative images of cells expressing *bub1-GFP* (wild type or cm1 mutant), *plo1+-mCherry* and *nda3-KM311*. Cells were grown at permissive temperature for *nda3-KM311* (30 °C). Both wild type Bub1 and Bub1-cm1 enrich in the nucleus in interphase. Inset: Plo1-mCherry marks mitotic spindle pole bodies, and both Bub1 and Bub1-cm1 localize to the region of the mitotic spindle (most likely by localizing to unattached kinetochores). Scale bar: 10  $\mu$ m. Insets are additionally magnified 1.87-fold.

**H** Mad1-GFP localisation to the nuclear rim is not impaired by the *bub1-cm1* mutation  
Representative images of cells expressing *bub1* (wild type or *cm1* mutant), *mad1+-GFP*, *plo1+-mCherry* and *nda3-KM311*. Cells were grown at permissive temperature for *nda3-KM311* (30 °C). Nuclei of mitotic cells with Mad1-GFP signal from these panels are shown in Fig 1J. Scale bar: 10  $\mu\text{m}$ .

**I** Bub1-*cm1* mutation affects kinetochore localisation of Mad2 but not Mad3 and Bub3  
Representative nuclei of mitotic cells expressing *bub1* (wild type or *cm1* mutant), the indicated GFP fusions, *plo1+-mCherry* and *nda3-KM311*. Cells were grown at permissive temperature for *nda3-KM311* (30 °C). Scale bar: 2  $\mu\text{m}$
