# Supplementary material for: Mad1 contribution to spindle assembly checkpoint signalling goes beyond presenting Mad2 at kinetochores
Source: PubMed Central journal article supplement — EMBO Rep. 2014 Jan 29;15(3):291–8. doi: 10.1002/embr.201338114 (PMC3989695; doi:10.1002/embr.201338114), 2014-01-29
Supplement: embr0015-0291-sd13.pdf [file embr0015-0291-sd13.pdf]

# Supplementary Information

## Re-annotation of the Mad1 start codon

In the *Schizosaccharomyces pombe* genome database ([www.pombase.org](http://www.pombase.org); Jan 8<sup>th</sup>, 2014), the *mad1+* coding sequence is annotated to start at position 1,277,098 on chromosome II. Alignment with the sequence of other *Schizosaccharomyces* species [5] indicates that the first 13 amino acids (MSSKLTVYQATTS) are not conserved and that it is likely that the start codon is amino acid 14, another Methionine. To corroborate this notion, we performed mass spectrometric analysis of immunopurified Mad1, digested with either Asp-N, Lys-C or Trypsin. We identified peptides supporting both the first as well as the second Methionine as start codon. In one experiment, where peptides for both termini were found (see below; LTVYQATTSM(ox)ADSPR (amino acid 5-19) supporting the first Methionine, and (ac)ADS(ph)PRDPFQSR (amino acid 15-25) supporting the second Methionine), the intensity of the second peptide was 170-times higher than of the first. Together with the phylogenetic evidence, this suggests that the second Methionine is the more prominent start codon, although the first one can be used. The annotation in the *Schizosaccharomyces pombe* genome database will be revised accordingly (Val Wood, personal communication).

### Peptide 1 supporting translation from first Methionine:

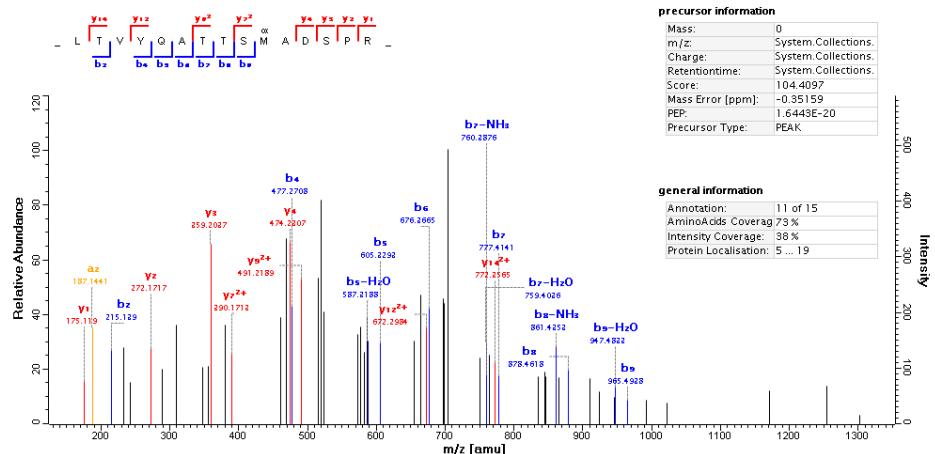

| a ion     |          | b ion     |          | y ion    |      | y <sup>2+</sup> ion |          |
|-----------|----------|-----------|----------|----------|------|---------------------|----------|
| Δ dalton  | mass     | Δ dalton  | mass     | Δ dalton | mass | Δ dalton            | mass     |
|           | 86.09643 | 114.0913  | 1        | L        | 14   |                     |          |
| +0.107487 | 187.1441 | -0.017483 | 215.139  | 2        | T    | 13                  | 1543.706 |
|           | 286.2125 |           | 314.2074 | 3        | V    | 12                  | 1442.658 |
|           | 449.2758 | +0.147757 | 477.2708 | 4        | Y    | 11                  | 1343.59  |
|           | 577.3344 | +0.094794 | 605.3293 | 5        | Q    | 10                  | 1180.526 |
|           | 648.3715 | +0.061282 | 676.3665 | 6        | A    | 9                   | 1052.468 |
|           | 749.4192 | +0.023064 | 777.4141 | 7        | T    | 8                   | 981.4306 |
|           | 850.4669 | +0.046796 | 878.4618 | 8        | T    | 7                   | 880.3829 |
|           | 937.4989 | +0.083127 | 965.4938 | 9        | S    | 6                   | 779.3352 |
|           | 1084.534 |           | 1112.529 | 10       | M    | 5                   | 692.3032 |
|           | 1155.571 |           | 1183.566 | 11       | A    | 4                   | 545.2678 |
|           | 1270.598 |           | 1298.593 | 12       | D    | 3                   | 474.2307 |
|           | 1357.63  |           | 1385.625 | 13       | S    | 2                   | 359.2037 |
|           | 1454.683 |           | 1482.678 | 14       | P    | 1                   | 272.1717 |
|           |          |           |          | 15       | R    | 0                   | 175.119  |

## Peptide 2 supporting translation from second Methionine:

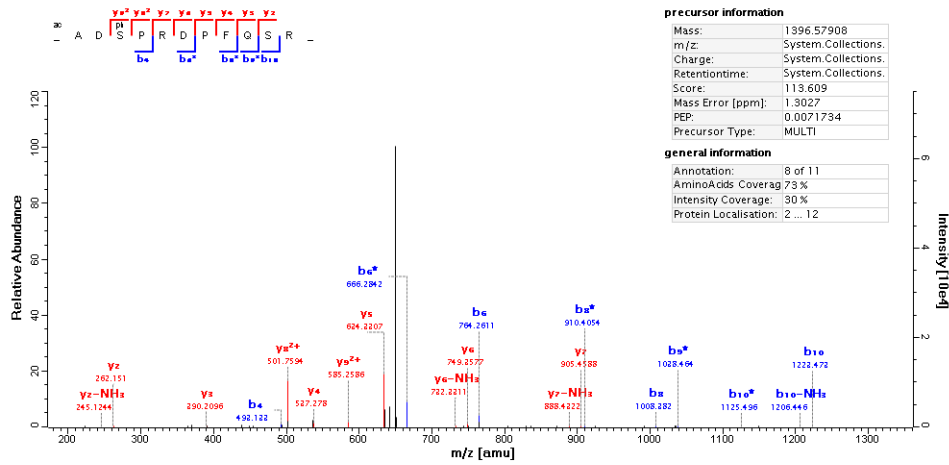

| b ion      |              |     |   | γ ion    |              |              | γ <sup>2+</sup> ion |  |
|------------|--------------|-----|---|----------|--------------|--------------|---------------------|--|
| Δ dalton   | mass         | seq |   | Δ dalton | mass         | Δ dalton     | mass                |  |
|            | 114.05495494 | 1   | A | 10       |              |              |                     |  |
|            | 229.08189797 | 2   | D | 9        | 1284.5368556 | 1284.5368556 |                     |  |
|            | 396.08025679 | 3   | S | 8        | 1169.5099126 | 585.25859453 | +0.0152092          |  |
| -0.1849616 | 493.13302064 | 4   | P | 7        | 1002.5115538 | 501.75941512 | +0.0294032          |  |
|            | 649.23413167 | 5   | R | 6        | 905.45878993 | 905.45878993 |                     |  |
| +0.0287813 | 764.2610747  | 6   | D | 5        | 749.3576789  | 749.3576789  | +0.1810174          |  |
|            | 861.31383856 | 7   | P | 4        | 634.33073587 | 634.33073587 | +0.0019668          |  |
| +0.0844223 | 1008.3822525 | 8   | F | 3        | 537.27797202 | 537.27797202 | -0.1872127          |  |
|            | 1136.44083   | 9   | Q | 2        | 390.2095581  | 390.2095581  | +0.1191772          |  |
| +0.1417656 | 1223.4728584 | 10  | S | 1        | 262.15098059 | 262.15098059 | +0.0349935          |  |
|            |              | 11  | R | 0        | 175.11895218 | 175.11895218 |                     |  |

## Supplementary References

5. Rhind N *et al* (2011) Comparative functional genomics of the fission yeasts. *Science* **332**: 930-936
