# Supplementary figures and images for: Mad1 contribution to spindle assembly checkpoint signalling goes beyond presenting Mad2 at kinetochores
Source: PubMed Central journal article supplement — EMBO Rep. 2014 Jan 29;15(3):291–8. doi: 10.1002/embr.201338114 (PMC3989695; doi:10.1002/embr.201338114), 2014-01-29

**Fig. 2C**

Mad1 (anti-GFP)

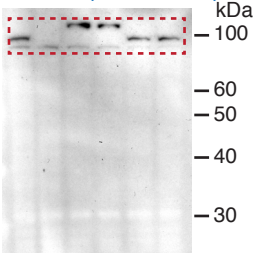

Cdc2

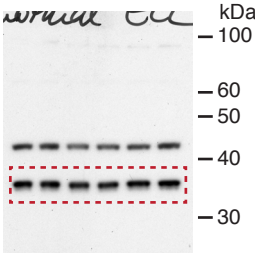

Supplement: embr0015-0291-sd3.pdf [file embr0015-0291-sd3.pdf]

**Fig. 3E**

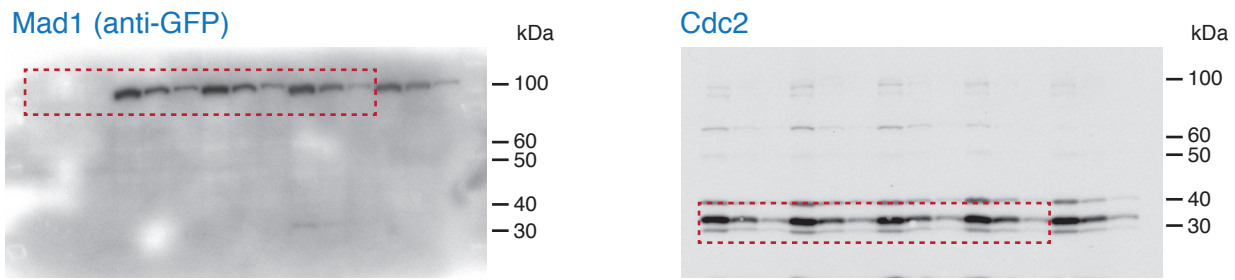

**Fig. 3F**

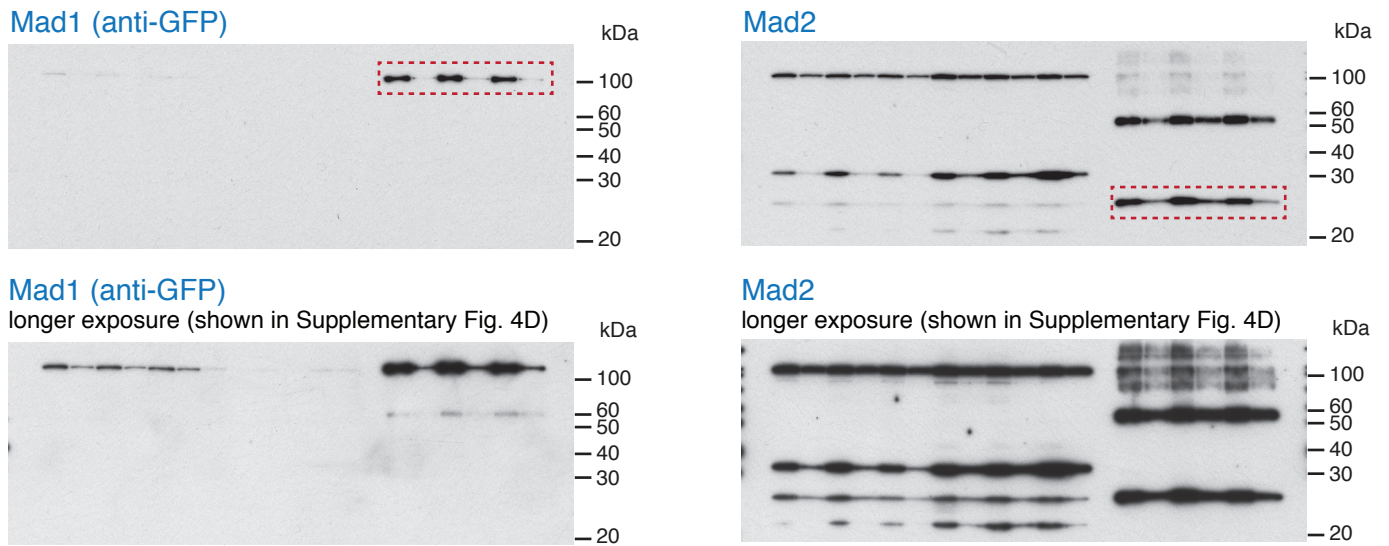

Supplement: embr0015-0291-sd4.pdf [file embr0015-0291-sd4.pdf]
